# Supplementary material for: Rapid and highly selective dipchecking for cyanide ions in aqueous media
Source: Royal Society of Chemistry journal article supplement (doi:10.1039/c2an35886g), 2012-01-01
Supplement: c2an35886g.pdf [file c2an35886g.pdf]

## Supporting Information

### Rapid and highly selective Dip-Checking for Cyanide ions in Aqueous Media.

Changerath Radhakumary and Kunnatheeri Sreenivasan\*

*Laboratory for Polymer Analysis, Biomedical Technology Wing, Sree Chitra Tirunal Institute for Medical Sciences & Technology, Thiruvananthapuram -695012, India.*

\*For Correspondence: Phone 091- 471 -2520248, Fax. 091- 471- 2341814. Email: [sreeni@sctimst.ac.in](mailto:sreeni@sctimst.ac.in)

1. **Figure S1 FTIR Spectra of virgin chitosan and the CH-Au NPs**
2. **Figure S2 The particle size analysis of CH-Au by DLS**
3. **Figure S3 TEM image of CH-Au NPs**
4. **Figure S4. The time bound colour bleaching of CH-Au film in 0.01M KCN**
5. **Figure S5. Absorption spectra (Inset the corresponding photographs) of CH-Au discs dipped in 1) DW, and anions 2)  $\text{Cl}^-$  3)  $\text{F}^-$  4)  $\text{PO}_4^{3-}$  5)  $\text{HCO}_3^-$  6)  $\text{Ac}^-$  7)  $\text{NO}_3^-$**
6. **Figure S6. The CH-Au films A) Control and on interacting with aqueous solutions of B) Sodium chloride, C) Potassium chloride, D) Manganese acetate, E) Lead acetate, F) Cadmium chloride, G) Calcium chloride, H) Potassium Ferricyanide, and I) Silver nitrate, (1000 mg/L each).**
7. **Figure S7. The CH-Au films A) Control and on interacting with aqueous solutions of B) Cysteine, C) Homocysteine and D) Glutathione (1000 mg/L each).**
8. **Figure S8. The CH-Au discs dipped in 1000mg/L aqueous solutions of Sodium thiosulphate, Ammonium thiocyanate and Sodium chloride.**
9. **Figure S9. Absorption spectra of CH-Au discs dipped in Tap water spiked with 10 mg/L  $\text{CN}^-$**

**Table T1: The summary of particle size data and gold content per disc of CH-Au**

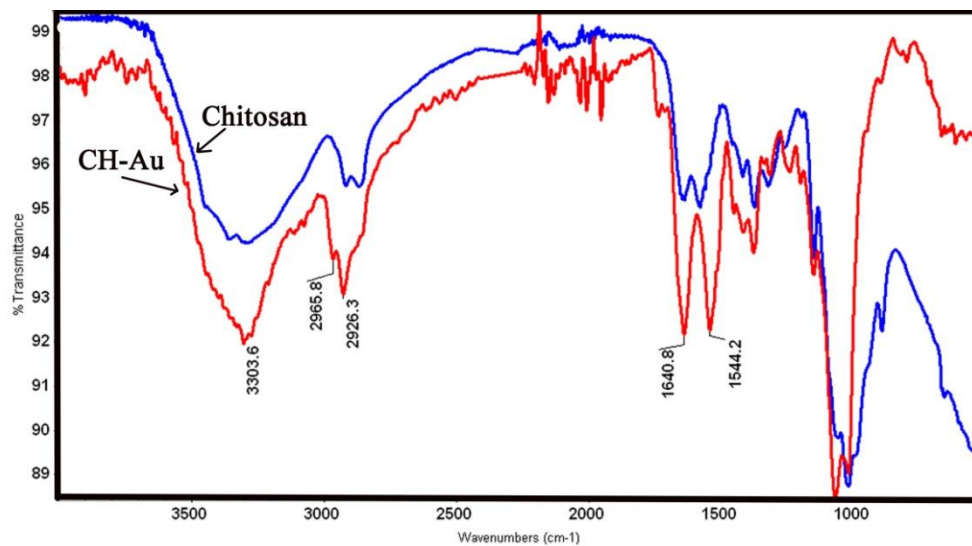

Figure S1 FTIR Spectra of virgin chitosan and the CH-Au NPs

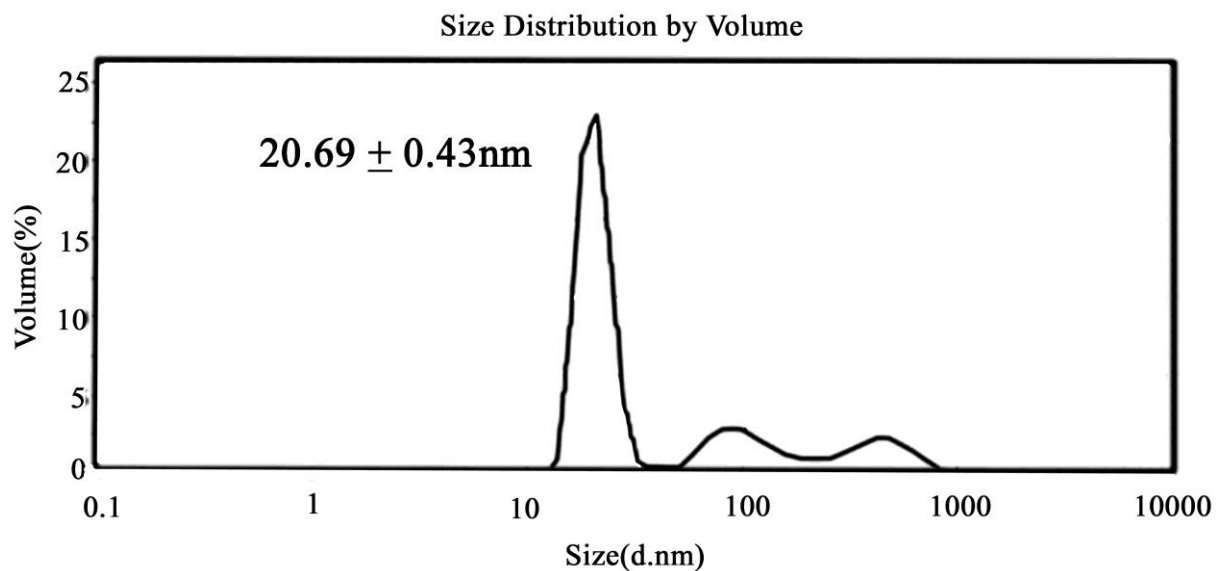

Figure S2. The particle size analysis of CH-Au by DLS

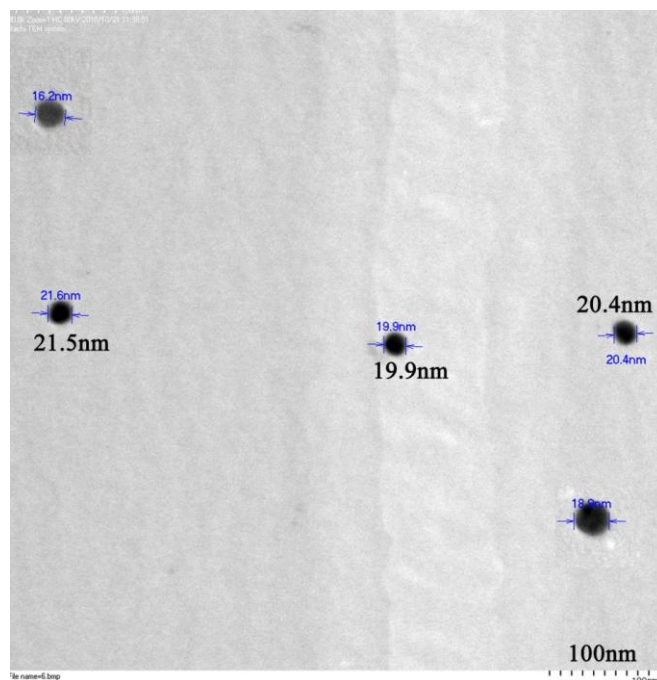

Figure S3. TEM image of CH-Au NPs

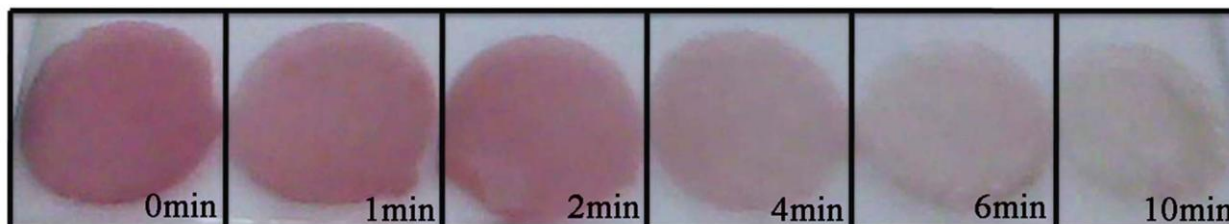

Figure S4. The time bound colour bleaching of CH-Au film in 0.01M KCN

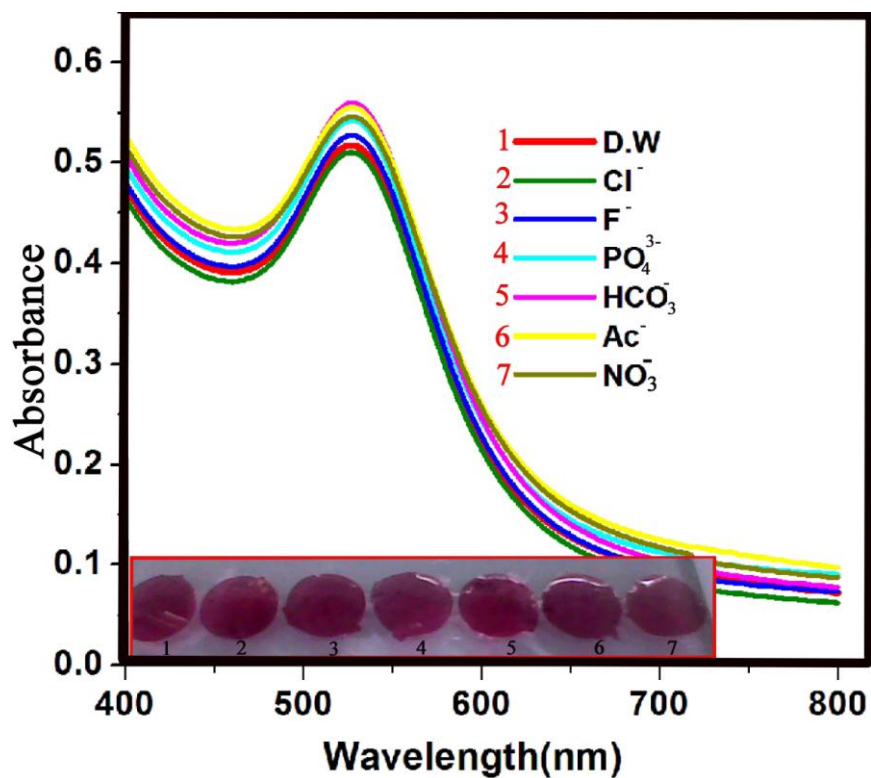

Figure S5. Absorption spectra (Inset the corresponding photographs) of CH-Au films dipped in 1) D.W, and anions like 2)  $\text{Cl}^-$  3)  $\text{F}^-$  4)  $\text{PO}_4^{3-}$  5)  $\text{HCO}_3^-$  6)  $\text{Ac}^-$  7)  $\text{NO}_3^-$

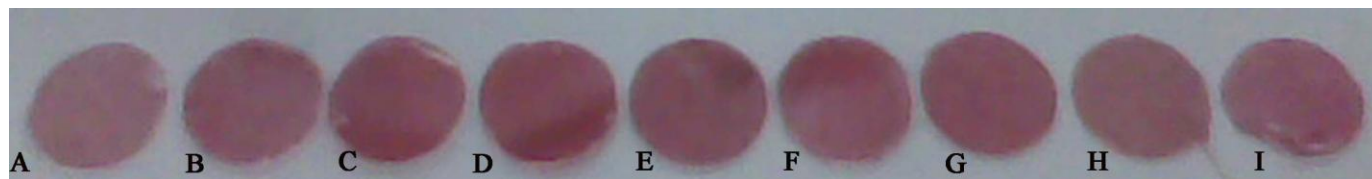

Figure S6. The CH-Au films A) Control and on interacting with aqueous solutions of B) Sodium chloride, C) Potassium chloride, D) Manganese acetate, E) Lead acetate, F) Cadmium chloride, G) Calcium chloride, H) Potassium Ferricyanide, and I) Silver nitrate, (1000 mg/L each).

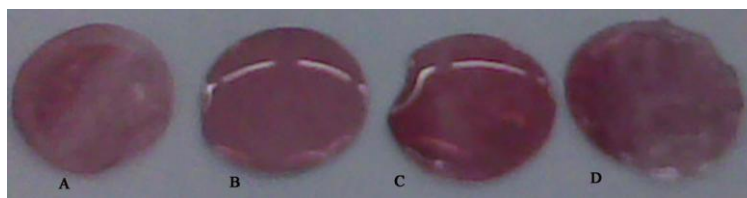

Figure S7. The CH-Au films A) Control and on interacting with aqueous solutions of B) Cysteine, C) Homocysteine and D) Glutathione (1000 mg/L each).

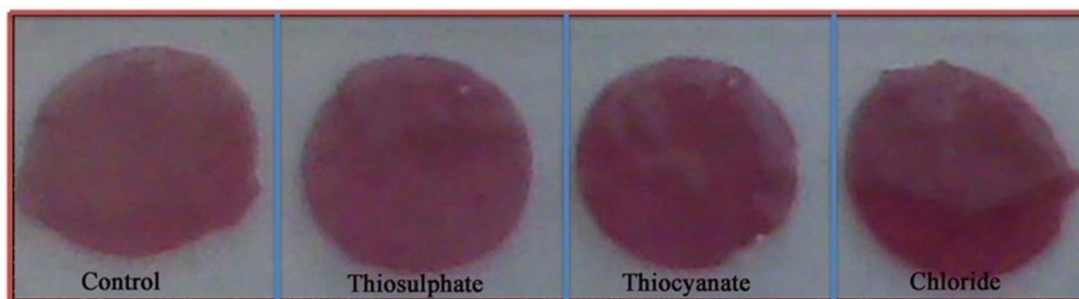

Figure S8. The CH-Au discs dipped in 1000mg/L aqueous solutions of Sodium thiosulphate, Ammonium thiocyanate and Sodium chloride.

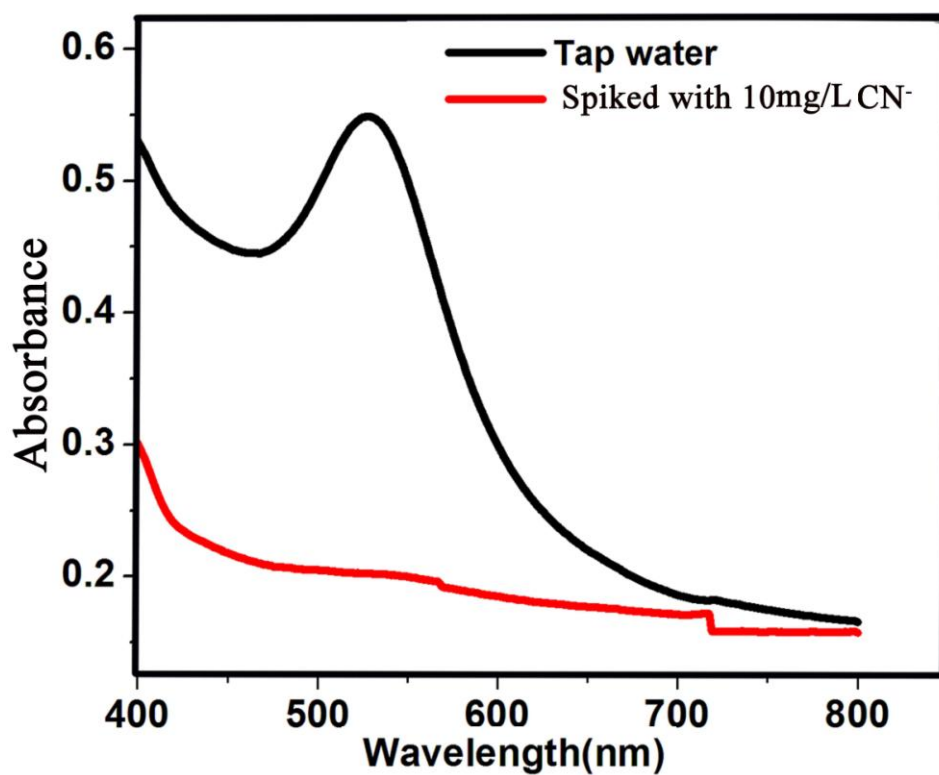

Figure S9. Absorption spectra of CH-Au discs dipped in Tap water spiked with 10 mg/L CN<sup>-</sup>

Table T1: The summary of particle size data and gold content per disc of CH-Au

|   |                      |                                  |
|---|----------------------|----------------------------------|
| 1 | Particle Size by DLS | 20.69 $\pm$ 0.43nm.              |
| 2 | Particle Size by TEM | 20.60 $\pm$ 0.80nm               |
| 3 | Gold content by ICP  | 15.6 $\pm$ 0.02 $\mu$ g per disc |
